# Supplementary material for: The one-step transformation of fructose to 2,5-diformylfuran over Ru metal supported on montmorillonite
Source: Royal Society of Chemistry journal article supplement (doi:10.1039/c9nj06275k), 2020-01-01

## One-step transformation of fructose to 2, 5-diformylfuran over Ru metal supported on montmorillonite

Amol B. Raut, Vaishali S. Shende, Bhalchandra M. Bhanage \*[a]

Department of Chemistry, Institute of Chemical Technology (ICT), Mumbai, India

Email ID: bm.bhanage@gmail.com; bm.bhanage@ictmumbai.edu.in

Fax: +91 2233611020; Tel: +91 2233612601

### Table of contents

| Sr. No. | Contents                                                                                                            | Page No. |
|---------|---------------------------------------------------------------------------------------------------------------------|----------|
| 1       | Figure S1. XPS spectrum: (a) Si 2p XPS spectra, (b) Al2p XPS spectra, (c) Mg1s XPS spectra and (d) C1s XPS spectra. | 2        |
| 2       | Figure S2. Recycling experiments for oxidation of HMF to DFF catalyst.                                              | 2        |
| 3       | Figure S3. Recycling experiments for one-pot and one-step conversion of fructose into DFF.                          | 3        |
| 4       | Figure S4. XPS scans of recycled 2 wt%Ru-MMT catalyst (a) Wide scan; (b) Ru 3d3/2 XPS spectra.                      | 3        |
| 5       | Figure S5. EDX spectra of recycled 2%Ru-MMT catalyst.                                                               | 4        |
| 6       | Figure S6. TEM image of recycled 2%Ru-MMT catalyst.                                                                 | 4        |
| 7       | Spectral data for 2, 5-Diformylfuran                                                                                | 5        |

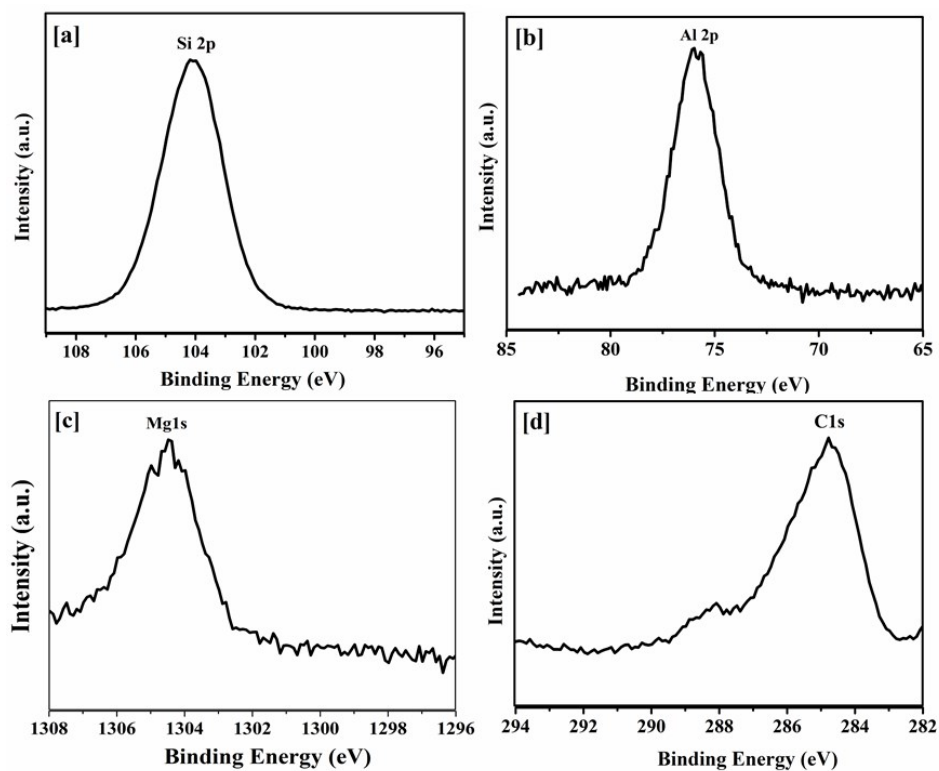

Figure S1. XPS spectrum: (a) Si 2p XPS spectra, (b) Al2p XPS spectra, (c) Mg1s XPS spectra and (d) C1s XPS spectra.

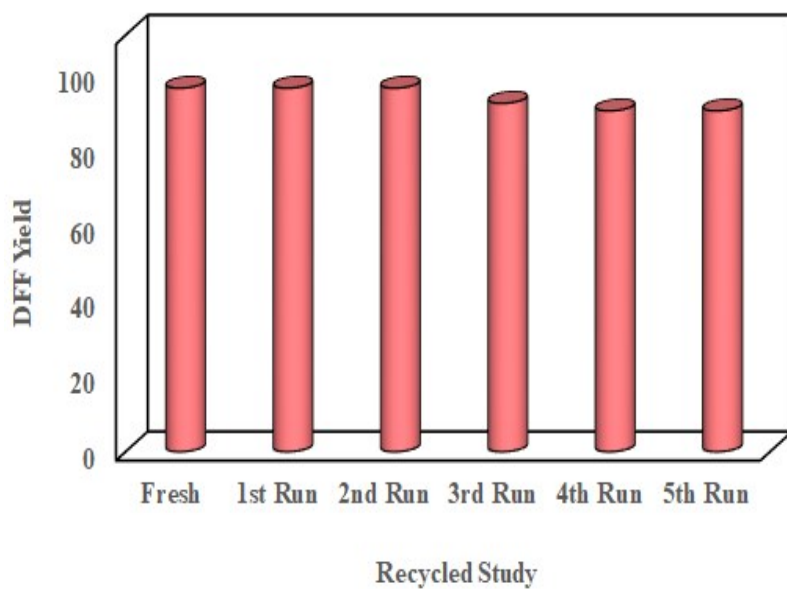

Figure S2. Recycling experiments for oxidation of HMF to DFF. Reaction conditions: HMF (63 mg, 1 mmol), catalyst (30 mg), DMSO (10 mL), at 120 °C, for 4 h and 3 bar O<sub>2</sub> pressure.

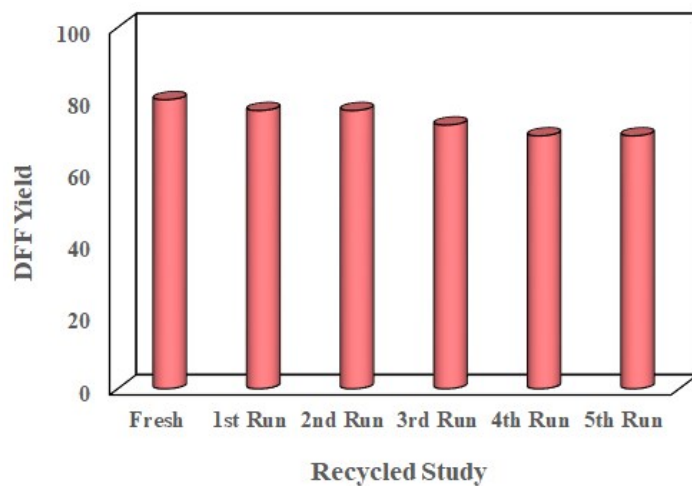

Figure S3. Recycling experiments for one-pot and one-step conversion of fructose into DFF. Reaction conditions: fructose (90 mg, 0.5 mmol), 2 wt% Ru-MMT (30 mg), DMSO (10 mL), at 120 °C. The 1<sup>st</sup> step and 2<sup>nd</sup> step performed under an O<sub>2</sub> (3 bar) atmosphere for 6 hrs.

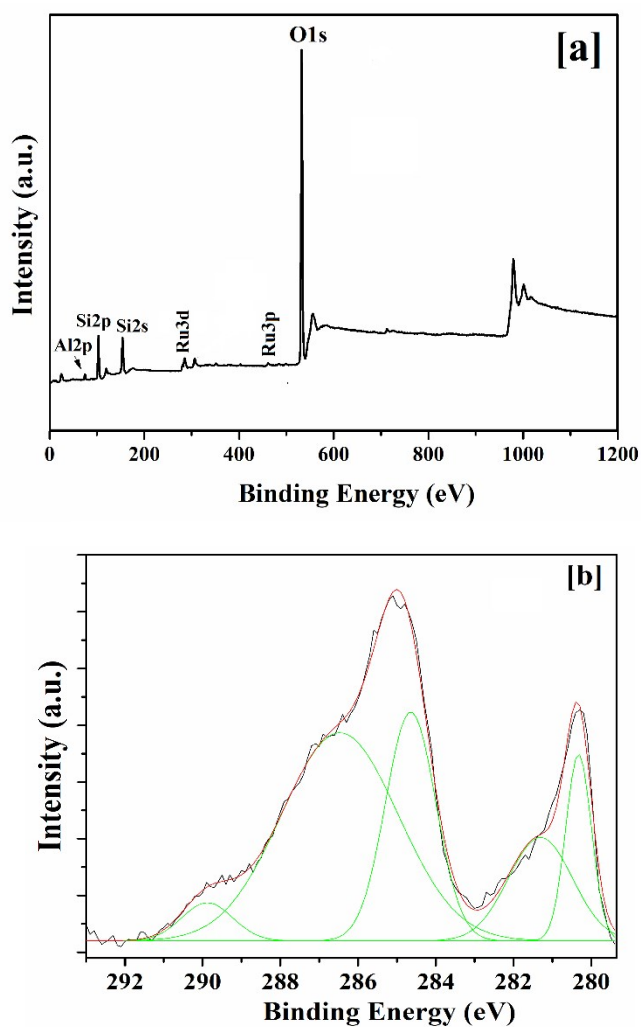

Figure S4. XPS scans of recycled 2 wt% Ru-MMT catalyst (a) Wide scan; (b) Ru 3d<sub>3/2</sub> XPS spectra.

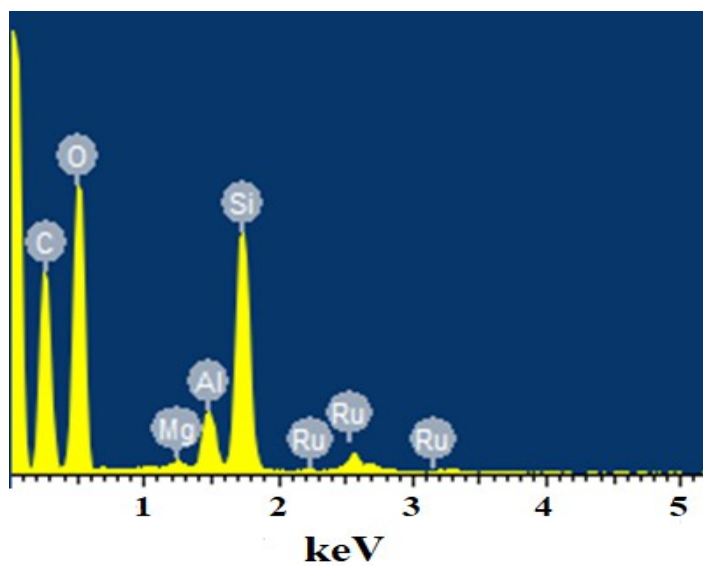

Figure S5. EDX spectra of recycled 2 wt% Ru-MMT catalyst.

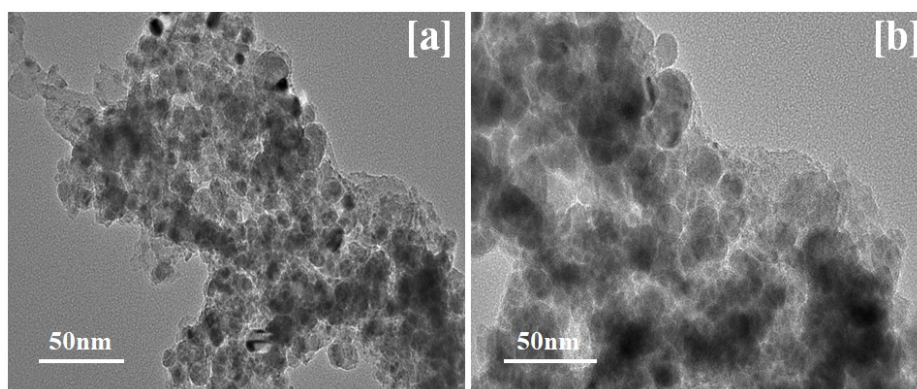

Figure S6. TEM image of recycled 2 wt% Ru-MMT catalyst.

### Spectral data for 2, 5-Diformylfuran

$^1\text{H NMR}$  (500 MHz,  $\text{CDCl}_3$ )  $\delta$  9.84 (s, 2H), 7.32 (s, 2H); GC-MS:  $m/z$  124, 95, 67, 43, 40.

### $^1\text{H NMR}$ spectral of 2, 5-Diformylfuran

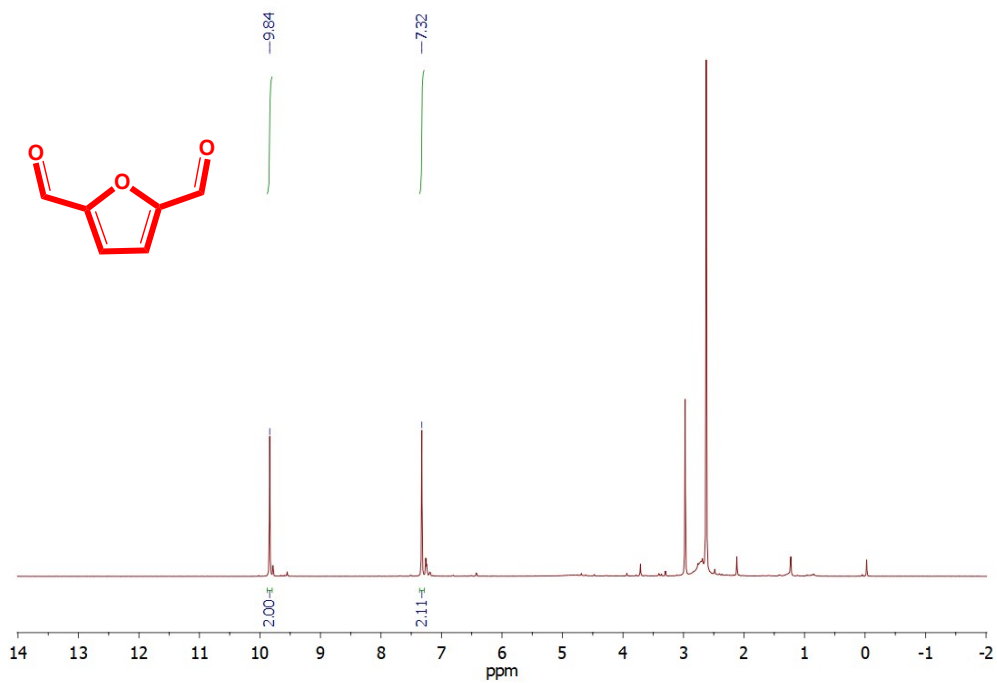

$^1\text{H NMR}$  (500 MHz,  $\text{CDCl}_3$ ) spectra of crude 2, 5-Diformylfuran obtained when the reaction was carried out on fructose.

### GC-MS spectral of 2, 5-Diformylfuran

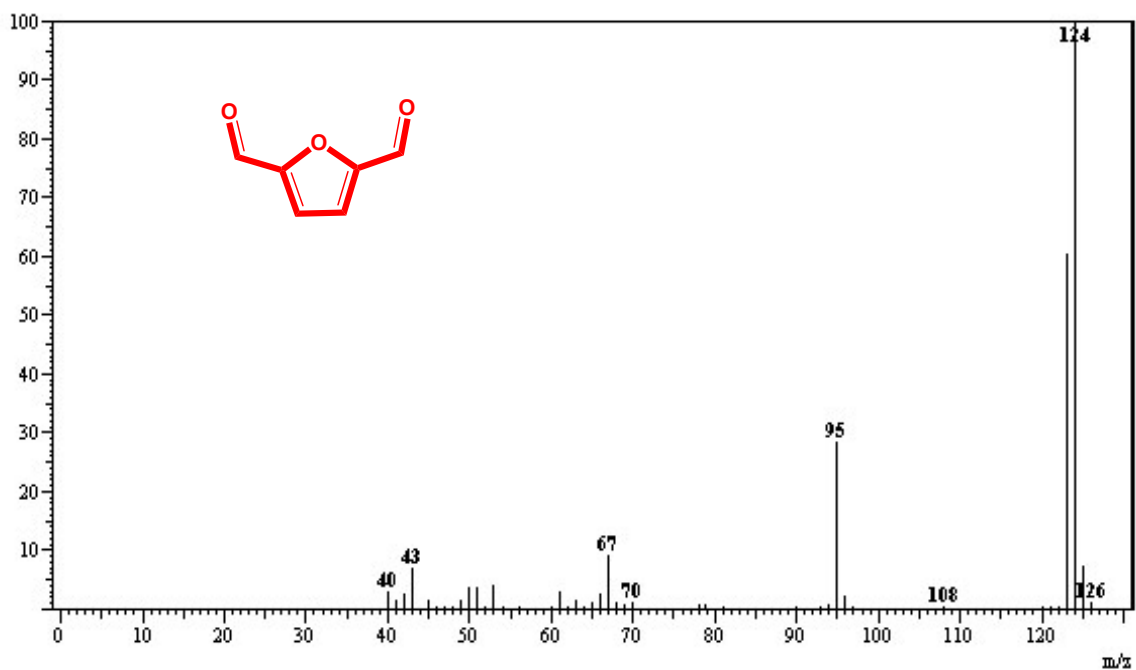

Supplement: c9nj06275k1.pdf [file c9nj06275k1.pdf]
